# Supplementary figures and images for: Repeatability and Reproducibility of Retinal Fractal Dimension Measured with Swept-Source Optical Coherence Tomography Angiography in Healthy Eyes: A Proof-of-Concept Study
Source: MDPI journal article supplement (doi:10.3390/diagnostics12071769), 2022-07-21

Supplementary Materials:

**Figure S1.** Skeleton—Red.

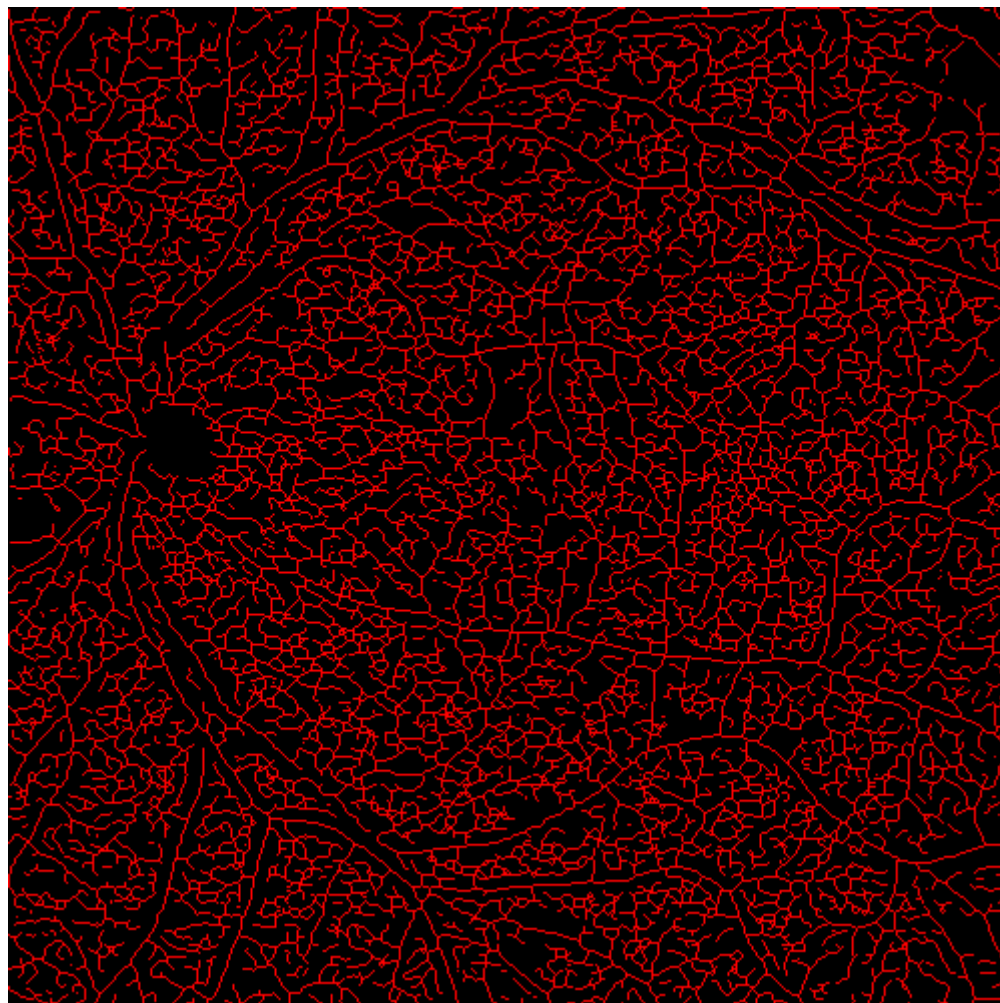

**Figure S2.** Skeleton superimposed on Greyscale.

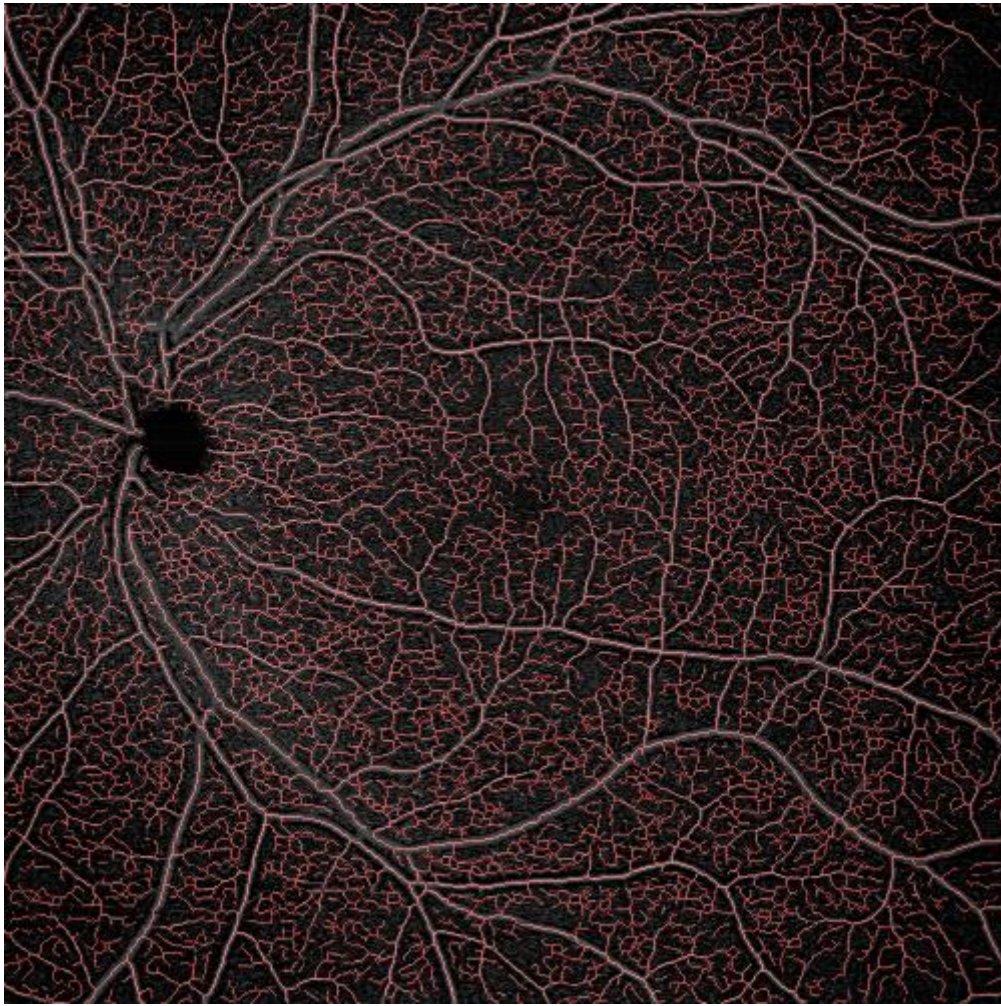

Supplement: s1 [file s1]
